# Supplementary material for: Differential Protein Profiling of Cerebrospinal Fluid in Piglets with Severe Meningoencephalitis Caused by Streptococcus suis Type 2 Compared to Controls
Source: Front Cell Infect Microbiol. 2018 Feb 9;8:35. doi: 10.3389/fcimb.2018.00035 (PMC5811643; doi:10.3389/fcimb.2018.00035)
Supplement: Supplementary file 3 [file DataSheet3.XLSX]

## Sheet: KEGGs
GOID	GOTerm	Ontology Source	Term PValue	Term PValue Corrected with Bonferroni step down	Group PValue	Group PValue Corrected with Bonferroni step down	GOLevels	GOGroups	% Associated Genes	Nr. Genes	Associated Genes Found
GO:0000020	Citrate cycle (TCA cycle)	KEGG_06.07.2015	1.6e-14	2.4e-12	1.6e-14	1.1e-13	[-1]	Group0	56.6667	17	[ACO1, ACO2, CS, DLAT, DLD, DLST, FH, IDH3A, IDH3B, IDH3G, MDH2, OGDH, PDHA1, PDHB, SDHA, SDHB, SUCLG1]
GO:0004961	Endocrine and other factor-regulated calcium reabsorption	KEGG_06.07.2015	2.3e-08	3.3e-06	2.3e-08	9.3e-08	[-1]	Group1	33.3333	14	[AP2A1, AP2B1, AP2M1, AP2S1, ATP1A2, ATP1A3, ATP1B1, ATP1B2, CALB1, CLTC, DNM1, DNM2, GNAQ, PRKCA]
GO:0000280	Valine, leucine and isoleucine degradation	KEGG_06.07.2015	5.2e-05	0.0071	5.2e-05	0.0001	[-1]	Group2	22.449	11	[ABAT, ACAT2, ALDH6A1, DBT, DLD, ECHS1, HADHA, HIBADH, HMGCL, HSD17B10, IVD]
GO:0000970	Aminoacyl-tRNA biosynthesis	KEGG_06.07.2015	6.7e-05	0.0091	6.7e-05	6.7e-05	[-1]	Group3	19.1176	13	[AARS, DARS, EPRS, FARSA, GARS, HARS, IARS2, KARS, NARS, SARS, VARS, WARS, YARS]
GO:0004540	Gap junction	KEGG_06.07.2015	2.5e-05	0.0035	2.2e-05	6.7e-05	[-1]	Group4	17.7778	16	[GJA1, GNAI2, GNAI3, GNAQ, GRB2, ITPR3, KRAS, LOC100158003, MAP2K1, MAP2K2, MAPK1, PRKCA, TUBA4A, TUBB2A, TUBB2B, TUBB4B]
GO:0004730	Long-term depression	KEGG_06.07.2015	6.7e-05	0.0091	2.2e-05	6.7e-05	[-1]	Group4	20.339	12	[GNAI2, GNAI3, GNAQ, GNAZ, ITPR3, KRAS, MAP2K1, MAP2K2, MAPK1, PPP2CB, PPP2R1A, PRKCA]
GO:0000010	Glycolysis / Gluconeogenesis	KEGG_06.07.2015	2e-08	3e-06	1.7e-09	8.5e-09	[-1]	Group5	29.0909	16	[ALDOC, DLAT, DLD, ENO2, GALM, GPI, HK1, LDHB, PDHA1, PDHB, PFKL, PGAM1, PGAM2, PGM1, PKM, TPI1]
GO:0000620	Pyruvate metabolism	KEGG_06.07.2015	2e-05	0.0028	1.7e-09	8.5e-09	[-1]	Group5	27.027	10	[ACAT2, DLAT, DLD, FH, GLO1, LDHB, MDH2, PDHA1, PDHB, PKM]
GO:0005230	Central carbon metabolism in cancer	KEGG_06.07.2015	2.4e-05	0.0033	1.7e-09	8.5e-09	[-1]	Group5	20.9677	13	[G6PD, GLS, HK1, KRAS, MAP2K1, MAP2K2, MAPK1, PDHA1, PDHB, PFKL, PGAM1, PGAM2, PKM]
GO:0004145	Phagosome	KEGG_06.07.2015	1.6e-05	0.0023	2.2e-13	1.3e-12	[-1]	Group6	14.8649	22	[ATP6V0A1, ATP6V0D1, ATP6V1A, ATP6V1C1, ATP6V1D, ATP6V1E1, ATP6V1F, ATP6V1G2, ATP6V1H, CANX, CTSL, LOC100157002, LOC100158003, RAB5B, RAB5C, SLA-1, SLA-2, STX12, TUBA4A, TUBB2A, TUBB2B, TUBB4B]
GO:0004721	Synaptic vesicle cycle	KEGG_06.07.2015	5.6e-18	8.5e-16	2.2e-13	1.3e-12	[-1]	Group6	44.0678	26	[AP2A1, AP2B1, AP2M1, AP2S1, ATP6V0A1, ATP6V0D1, ATP6V1A, ATP6V1C1, ATP6V1D, ATP6V1E1, ATP6V1F, ATP6V1G2, ATP6V1H, CLTC, DNM1, DNM2, NAPA, NSF, RAB3A, SLC17A7, SNAP25, STX1A, STX1B, STXBP1, SYT1, VAMP2]
GO:0004966	Collecting duct acid secretion	KEGG_06.07.2015	5e-05	0.0069	2.2e-13	1.3e-12	[-1]	Group6	30.7692	8	[ATP6V0A1, ATP6V0D1, ATP6V1A, ATP6V1C1, ATP6V1D, ATP6V1E1, ATP6V1F, ATP6V1G2]
GO:0000190	Oxidative phosphorylation	KEGG_06.07.2015	3.2e-15	4.7e-13	1.6e-18	1.2e-17	[-1]	Group7	25.9259	35	[ATP5A1, ATP5B, ATP5F1, ATP5I, ATP5J2, ATP5L, ATP6V0A1, ATP6V0D1, ATP6V1A, ATP6V1C1, ATP6V1D, ATP6V1E1, ATP6V1F, ATP6V1G2, ATP6V1H, COX5B, COX6B, LOC100524613, LOC100525869, LOC733678, NDUFA10, NDUFA12, NDUFA8, NDUFA9, NDUFB10, NDUFB4, NDUFC2, NDUFS1, NDUFS2, NDUFS3, NDUFS7, NDUFV1, PPA1, SDHA, SDHB]
GO:0005010	Alzheimer's disease	KEGG_06.07.2015	4.4e-09	6.4e-07	1.6e-18	1.2e-17	[-1]	Group7	17.7143	31	[ATP2A2, ATP5A1, ATP5B, ATP5F1, CDK5, COX5B, COX6B, CYCS, GNAQ, HSD17B10, ITPR3, LOC100524613, LOC100525869, LOC733678, MAPK1, MAPT, NDUFA10, NDUFA12, NDUFA8, NDUFA9, NDUFB10, NDUFB4, NDUFC2, NDUFS1, NDUFS2, NDUFS3, NDUFS7, NDUFV1, SDHA, SDHB, SNCA]
GO:0005012	Parkinson's disease	KEGG_06.07.2015	2.1e-14	3.1e-12	1.6e-18	1.2e-17	[-1]	Group7	23.8411	36	[ATP5A1, ATP5B, ATP5F1, COX5B, COX6B, CYCS, GNAI2, GNAI3, LOC100524613, LOC100525869, LOC733678, NDUFA10, NDUFA12, NDUFA8, NDUFA9, NDUFB10, NDUFB4, NDUFC2, NDUFS1, NDUFS2, NDUFS3, NDUFS7, NDUFV1, PARK7, SDHA, SDHB, SEPT5, SLC25A4, SLC25A5, SLC25A6, SNCA, UBA1, UCHL1, VDAC1, VDAC1P5, VDAC2]
GO:0005016	Huntington's disease	KEGG_06.07.2015	3e-11	4.3e-09	1.6e-18	1.2e-17	[-1]	Group7	18.593	37	[AP2A1, AP2B1, AP2M1, AP2S1, ATP5A1, ATP5B, ATP5F1, CLTC, COX5B, COX6B, CYCS, DCTN1, GNAQ, LOC100524613, LOC100525869, LOC733678, NDUFA10, NDUFA12, NDUFA8, NDUFA9, NDUFB10, NDUFB4, NDUFC2, NDUFS1, NDUFS2, NDUFS3, NDUFS7, NDUFV1, SDHA, SDHB, SLC25A4, SLC25A5, SLC25A6, SOD2, VDAC1, VDAC1P5, VDAC2]
